## Combined impact of residual inflammatory risk and chronic kidney disease on long-term clinical outcomes in patients undergoing percutaneous coronary intervention

N. Takahashi<sup>1</sup>, T. Dohi<sup>1</sup>, T. Funamizu<sup>1</sup>, H. Endo<sup>1</sup>, H. Wada<sup>2</sup>, S. Doi<sup>1</sup>, Y. Kato<sup>1</sup>, M. Ogita<sup>2</sup>, I. Okai<sup>1</sup>, H. Iwata<sup>1</sup>, S. Okazaki<sup>1</sup>, K. Isoda<sup>1</sup>, K. Miyauchi<sup>1</sup>, K. Shimada<sup>1</sup>

<sup>1</sup>Juntendo University Graduate School of Medicine, Cardiovascular Medicine, Tokyo, Japan; <sup>2</sup>Juntendo University Shizuoka Hospital, Cardiology, Izunokuni, Japan

**Funding Acknowledgement:** Type of funding source: None

**Background:** Inflammatory status pre-percutaneous coronary intervention (PCI) and post-PCI has been reported not only associated with poor prognosis, but also to impair renal function. Statins reduce cardiovascular events by lowering lipids and have anti-inflammatory impacts, but residual inflammatory risk (RIR) exists. It remains unclear that the synergistic effect of RIR and chronic kidney disease (CKD) on long-term clinical outcome in stable coronary artery disease (CAD) patients undergoing PCI in statin era.

**Aim:** The aim of this study was to investigate the long-term combined impact of RIR evaluating hs-CRP at follow-up and CKD among stable CAD patients undergoing PCI in statin era.

**Methods:** This is a single-center, observational, retrospective cohort study assessing consecutive 2,984 stable CAD patients who underwent first PCI from 2000 to 2016. We analyzed 2,087 patients for whom hs-CRP at follow-up (6–9 months later) was available. High residual inflammatory risk was defined as hs-CRP >0.6 mg/L according to the median value at follow up. Patients were assigned to four groups as Group1 (high RIR and CKD), Group2 (low RIR and CKD), Group3 (high RIR and non-CKD) or Group4

(low RIR and non-CKD). We evaluated all-cause death and major adverse cardiac events (MACE), defined as a composite of cardiovascular (CV) death, non-fatal myocardial infarction (MI) and non-fatal stroke.

**Results:** Of patients (83% men; mean age 67 years), there were 299 (14.3%) patients in group 1, 201 (9.6%) patients in group 2, 754 (36.1%) patients in group 3, and 833 (39.9%) patients in group 4. The median follow-up period was 5.2 years (IQR, 1.9–9.9 years). In total, 189 (frequency, 16.1%) cases of all-cause death and 128 (11.2%) MACE were identified during follow-up, including 53 (4.6%) CV deaths, 27 (2.4%) MIs and 52 (4.8%) strokes. The rate of all-cause death and MACE in group 1 was significantly higher than other groups ( $p < 0.001$ , respectively). There was a stepwise increase in the incidence rates of all-cause death and MACE. After adjustment for important covariates, the presence of high RIR and/or CKD were independently associated with higher incidence of MACE and higher all-cause mortality. (shown on figure).

**Conclusion:** The presence of both high RIR and CKD conferred a synergistic adverse effect on the risk for long-term adverse cardiac events in patients undergoing PCI.

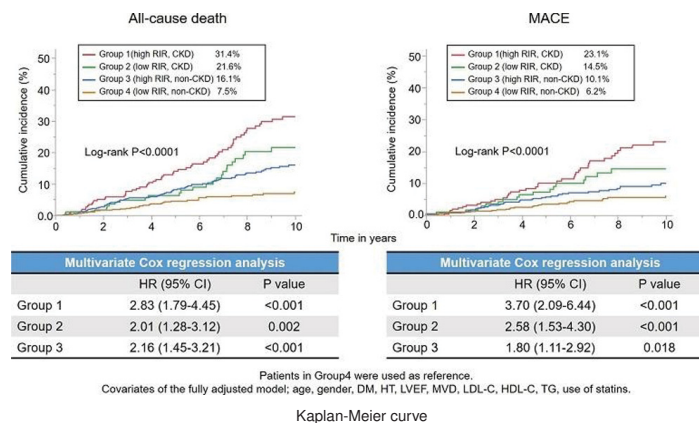

Kaplan-Meier curve
